# Supplementary material for: Dispersing nano- and micro-sized portlandite particulates via electrosteric exclusion at short screening lengths
Source: Royal Society of Chemistry journal article supplement (doi:10.1039/d0sm00045k), 2020-01-01
Supplement: d0sm00045k1.pdf [file d0sm00045k1.pdf]

Revised for Submission to Soft Matter (March 2020)

1  
2  
3  
4  
5  
6  
7  
8  
9  
10  
11  
12  
13

## Supporting Information

for

### Dispersing nano- and micro-sized portlandite particulates via electrosteric exclusion at short screening lengths

*Jason Timmons* (<sup>a,b,+</sup>), *Iman Mehdipour* (<sup>b,+</sup>), *Shang Gao* (<sup>c</sup>), *Hakan Atahan* (<sup>b,d</sup>), *Narayanan Neithalath* (<sup>e</sup>), *Mathieu Bauchy* (<sup>f,i</sup>), *Edward Garboczi* (<sup>g</sup>), *Samanvaya Srivastava* (<sup>c,i,\*\*</sup>), *Gaurav Sant* (<sup>a,b,h,i,\*\*</sup>)

---

<sup>a</sup> Department of Materials Science and Engineering, University of California, Los Angeles, CA 90095, USA

<sup>b</sup> Laboratory for the Chemistry of Construction Materials (LC<sup>2</sup>), Department of Civil and Environmental Engineering, University of California, Los Angeles, CA 90095, USA

<sup>c</sup> Department of Chemical and Biomolecular Engineering, University of California, Los Angeles, CA 90095, USA

<sup>d</sup> Department of Civil Engineering, Istanbul Technical University, Istanbul, Turkey

<sup>e</sup> School of Sustainable Engineering and the Built Environment, Arizona State University, Tempe, AZ 86587, USA

<sup>f</sup> Laboratory for the Physics of Amorphous and Inorganic Solids (PARISlab), Department of Civil and Environmental Engineering, University of California, Los Angeles, CA 90095, USA

<sup>g</sup> Applied Chemicals and Materials Division, Material Measurement Laboratory, National Institute of Standards and Technology, Boulder, CO 80305, USA

<sup>h</sup> California Nanosystems Institute (CNSI), University of California, Los Angeles, CA 90095, USA

<sup>i</sup> Institute for Carbon Management, University of California, Los Angeles, CA 90095, USA

<sup>+</sup> Both authors contributed equally to this work.

**\*\*Corresponding authors:** S. Srivastava, Email: [samsri@ucla.edu](mailto:samsri@ucla.edu) and G. Sant, Email: [gsant@ucla.edu](mailto:gsant@ucla.edu)

14  
15  
16  
17  
18

Number of pages: 6 (including the title page)  
Number of figures: 5

19 **(A) Particle Size Distribution**

20 The particle size distribution of portlandite particulates was determined by static light  
 21 scattering. To confirm that the particle size distribution measured by this technique was that of  
 22 aggregates of particles, SEM and TEM were performed (see Figure S1).

23

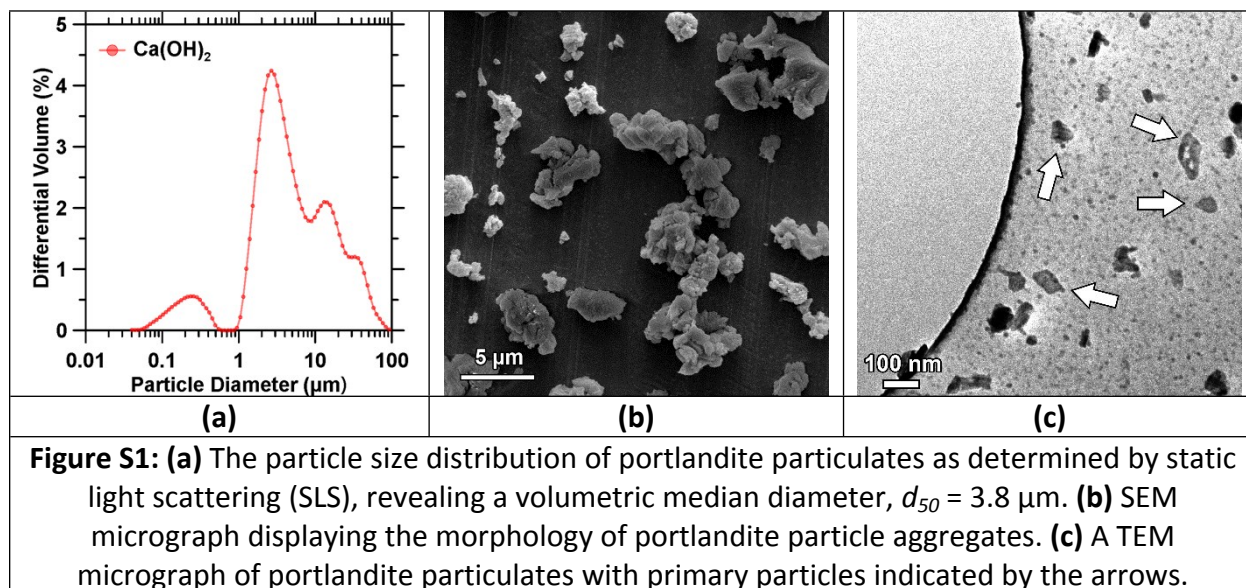

24

25 **(B) Fourier Transform Infrared Spectroscopy**

26 Fourier Transform Infrared (FTIR, PerkinElmer Spectrum Two)\* spectroscopy was performed on  
 27 each of the three dispersants. From the spectra, shown in Figure S2, three relevant functional  
 28 groups have been identified: the carbonyl group, present on the PAA backbone, the ether  
 29 group, present on the side chains in PCE, and the sulfonic acid group, present in LS but also  
 30 appearing slightly in PAA.

---

\* Certain commercial equipment, software and/or materials are identified in this paper in order to adequately specify the experimental procedure. In no case does such identification imply recommendation or endorsement by the National Institute of Standards and Technology, nor does it imply that the equipment and/or materials used are necessarily the best available for the purpose.

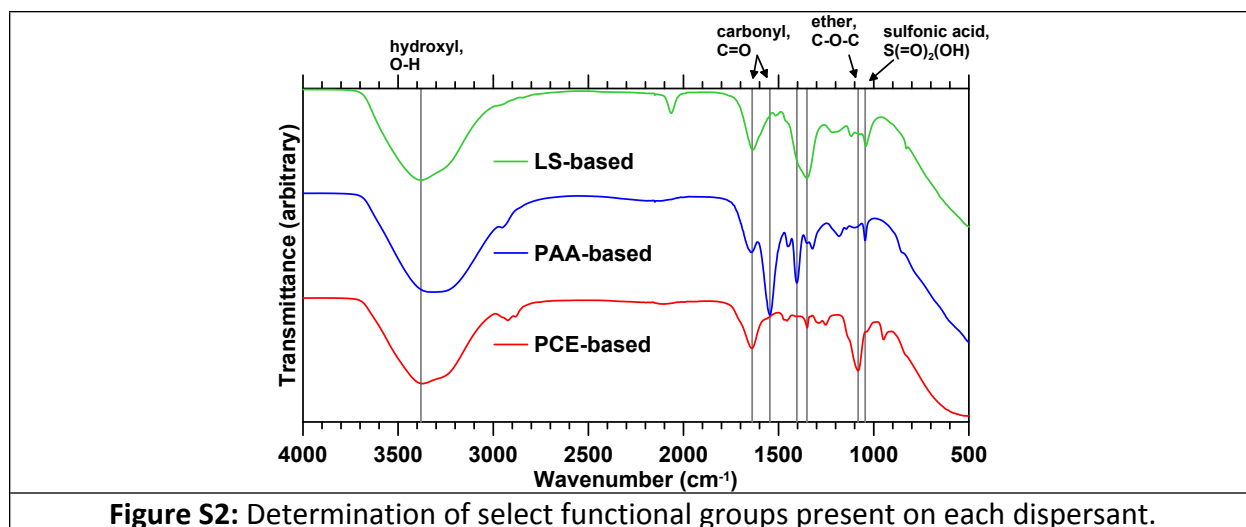

31

32 **(C) Lifshitz Theory for Calculation of the Hamaker Constant**

33 The following equation was used to calculate the Hamaker Constant  $A$  for the suspension of the  
 34  $\text{Ca}(\text{OH})_2$  particles (denoted by subscript  $p$ ) and saturated  $\text{Ca}(\text{OH})_2$  solutions (denoted by  
 35 subscript  $m$ ). It includes terms for the Boltzmann constant ( $k_b$ ), permittivity ( $\epsilon$ ), refractive index  
 36 ( $n$ ), Planck constant ( $h$ ), and electron frequency ( $\nu_e$ ).<sup>1</sup>

|                                                                                                                                                                  |                    |
|------------------------------------------------------------------------------------------------------------------------------------------------------------------|--------------------|
| $A = \frac{3}{4}kT \left( \frac{\epsilon_p - \epsilon_m}{\epsilon_p + \epsilon_m} \right)^2 + \frac{3h\nu_e (n_p^2 - n_m^2)^2}{16\sqrt{2}(n_p^2 + n_m^2)^{3/2}}$ | <b>Equation S1</b> |
|------------------------------------------------------------------------------------------------------------------------------------------------------------------|--------------------|

37

38 **(D) Kinetic Stability Criterion**

39 This methodology follows that of Israelachvili.<sup>1</sup> A suspended particle (mass  $m_p$ , diameter  $D$ ,  
 40 density  $\rho_p$ ) has a velocity  $v$  due to thermal (Brownian) forces caused by random motion of the  
 41 solvent, with kinetic energy on the order of the thermal energy, approximately the product of  
 42 the Boltzmann constant  $k$  and the absolute temperature  $T$ :

|                                                                                                                      |                    |
|----------------------------------------------------------------------------------------------------------------------|--------------------|
| $\frac{1}{2}m_p v^2 = \frac{1}{2} \left[ \frac{4}{3} \pi \left( \frac{D}{2} \right)^3 \rho_p \right] v^2 \approx kT$ | <b>Equation S2</b> |
|----------------------------------------------------------------------------------------------------------------------|--------------------|

43

44 The average particle velocity can thus be determined as:

|                                                |                    |
|------------------------------------------------|--------------------|
| $v \approx \sqrt{\frac{12kT}{\pi d^3 \rho_p}}$ | <b>Equation S3</b> |
|------------------------------------------------|--------------------|

45

46 The number density of particles  $N_p$  is given by the ratio of the total mass of particles  $m_{pT}$  over  
 47 the mass of a single particle  $m_p$ . The total mass of particles can be determined from the particle  
 48 concentration  $c$  and the medium density  $\rho_m$ .

|                                                                                                 |                    |
|-------------------------------------------------------------------------------------------------|--------------------|
| $N_p = \frac{m_{pT}}{m_p} = \frac{c\rho_m}{\frac{4}{3}\pi \left( \frac{D}{2} \right)^3 \rho_p}$ | <b>Equation S4</b> |
|-------------------------------------------------------------------------------------------------|--------------------|

49

50 The cubic root of the number density gives the linear number density of particles, the inverse of  
 51 which gives the distance between particles – the interparticle spacing  $d$ .

|                               |                    |
|-------------------------------|--------------------|
| $d = \frac{1}{\sqrt[3]{N_p}}$ | <b>Equation S5</b> |
|-------------------------------|--------------------|

52  
 53 The collision frequency  $f_c$  is given by the inverse of the time it takes a particle to travel the  
 54 interparticle distance:

|                     |                    |
|---------------------|--------------------|
| $f_c = \frac{v}{d}$ | <b>Equation S6</b> |
|---------------------|--------------------|

55  
 56 The probability  $p$  of two particles having sufficient energy to overcome a repulsive barrier  $E$ :

|                                      |                    |
|--------------------------------------|--------------------|
| $p = \exp\left(\frac{-E}{kT}\right)$ | <b>Equation S7</b> |
|--------------------------------------|--------------------|

57  
 58 For a given time  $t$ , one can then determine the minimum barrier for which no collisions are  
 59 energetic enough to overcome this barrier:

|                                                |                    |
|------------------------------------------------|--------------------|
| $\left(\frac{E}{kT}\right)_{min} = \ln(t f_c)$ | <b>Equation S8</b> |
|------------------------------------------------|--------------------|

60  
 61 This value is dependent on particle size; for 24 h of stability: 20 nm -> 28 kT, 100 nm -> 25 kT, 200  
 62 nm -> 22 kT

63  
 64 **(E) Yield stress Behavior for PCE-containing Suspensions**

65 Figure S3 shows yield stress results determined at a variety of solid volume fractions and PCE  
 66 dosages, following the same procedure described in the main body of the paper. It illustrates  
 67 that the impact of PCE is systematic across the range of yield stresses and solid volume  
 68 fractions examined here, and that higher solid volume fractions are accessible due to increasing  
 69 the dosage of PCE.

70

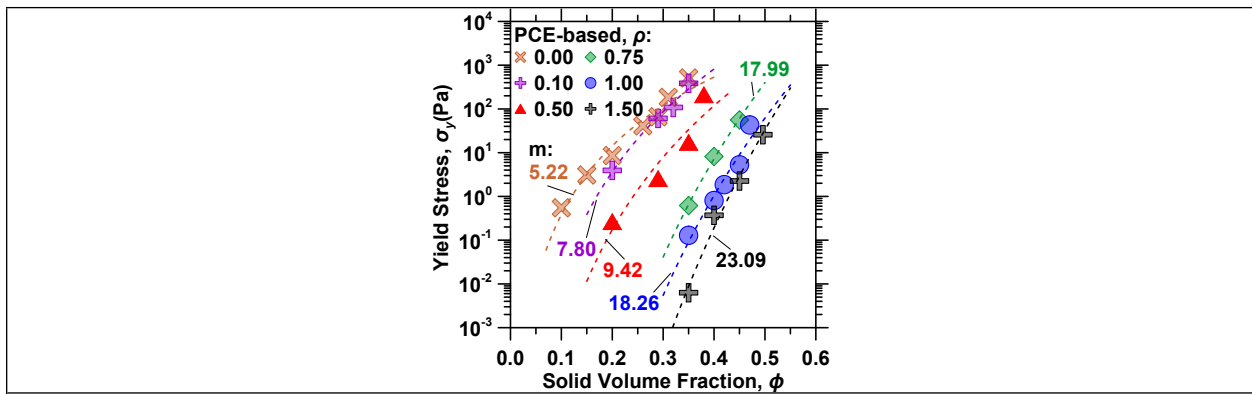

**Figure S3:** Yield stress-particle volume fraction curves of  $\text{Ca}(\text{OH})_2$  suspensions at varying PCE dosages. Data was fitted by a power-law function of the form  $\sigma_y = a(\phi)^m$ .

71

72 **(F) Fractal Dimension of Aggregates**

73 The fractal dimension  $D_f$  of suspensions composed at varying dispersant dosages was  
 74 calculated from the data and fits presented in Figure S3. These results are reported in the main  
 75 text, Figure 2b. The data was fit to an expression of the form  $\sigma_y = a(\phi)^m$ , where  $m = \frac{D + X}{D - D_f}$ ,  $D$   
 76 being the number of spatial dimensions (3) and  $X$  as the fractal dimension of the cluster  
 77 backbones, taken as 1.<sup>2</sup> Each fit was determined for a series of suspensions at varying solid  
 78 volume fractions for each dispersant dosage. For PCE, the range of volume fractions was  
 79 gradually increased along with the dosage, to illustrate the increase of maximum solid volume.

80  
 81 **(G) Crossover Energy**

82 The crossover energy of select suspensions at a fixed volume fraction ( $\phi = 0.25$ ) was  
 83 determined. The crossover energy is defined as the integral of the storage modulus ( $G'$ ) from  
 84 0.001 strain amplitude ( $\gamma$ ) to the crossover point ( $\gamma_{cr}$ ), where the loss modulus ( $G''$ ) first exceeds  
 85 the storage modulus. Thus, the work required to break down the structure of suspension can

$$E_{cr} = \int_{0.001}^{\gamma_{cr}} \gamma_{cr} G' d\gamma$$

86 be expressed as . Figure S4a illustrates the method of calculating the  
 87 crossover energy, and Figure S4b shows the trends with dosage, which follows that of yield  
 88 stress very closely. The crossover energy describes the strength of aggregates, as it is the  
 89 energy required to alter the suspension from a solid-like state (low strain amplitude, high  
 90 storage modulus) to a liquid-like state (high strain amplitude,  $G'' > G'$ ). Suspensions containing  
 91 PCE have the lowest crossover energy, signifying that any aggregates present are significantly  
 92 weaker than those found in suspensions with other dispersants or no dispersant.

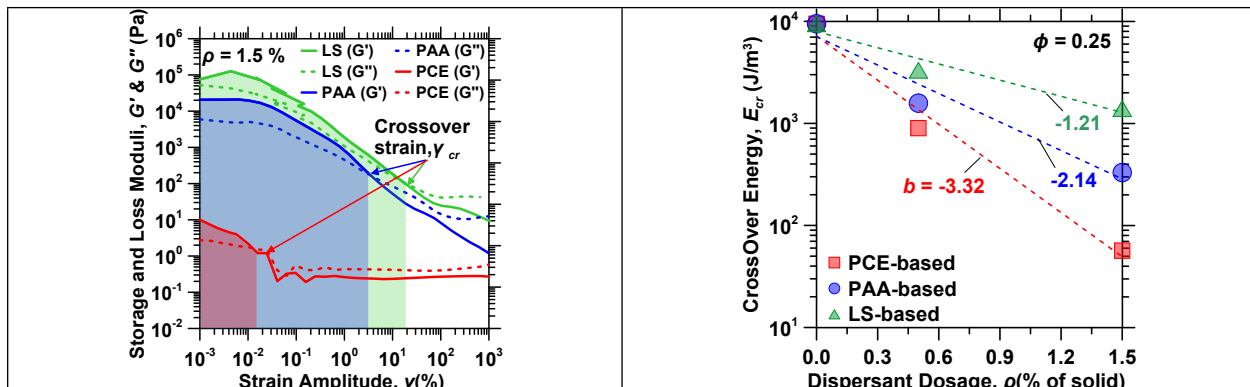

**Figure S4:** (a) Representative illustration of the method of calculating crossover energy for two examples of suspensions. (b) The dependence of crossover energy of  $\text{Ca}(\text{OH})_2$  suspensions to dispersant type for varying dispersant dosages. The dashed lines indicate exponential function fits to the data of the form  $\sigma_y = a \exp(-b\rho)$ , where  $a$  and  $b$  are fitting parameters and  $\rho$  is the dispersant dosage.

94

95 **(H) Nuclear Magnetic Resonance Characterization**

96 To obtain information about the structure of each polymer, proton nuclear magnetic resonance  
97 spectroscopy ( $^1\text{H}$  NMR; Bruker AV400) was performed. The carrier fluid for each polymer was  
98 deuterium oxide ( $\text{D}_2\text{O}$ ); as each dispersant is provided in aqueous solution, they were first dried  
99 via a combination of vacuum desiccation and oven drying at  $60\text{ }^\circ\text{C}$ . 10 mg of the dry polymer  
100 was then added to  $\text{D}_2\text{O}$  and dissolved with the aid of ultrasonication, and then further analyzed.  
101 The structure of PCE (Figure S5) was determined from these results and it was found that the  
102 backbone unit ( $m$ ) to side chain unit ( $n$ ) for each group was 1:1. Due to unreacted PEG side  
103 chains present in samples, the correct proportion of a number of PEG units in the side chain ( $p$ )  
104 could not be determined directly from NMR. This proportion was instead inferred from the  
105 relative peaks for the groups determined from FTIR ( $p = 18$ ), as described elsewhere.<sup>3</sup>  
106 Combining these results with the known total molecular weight (i.e., backbone + side chain), a  
107 number of backbone units and side chain units were found to be  $m = n = 41$ .  
108

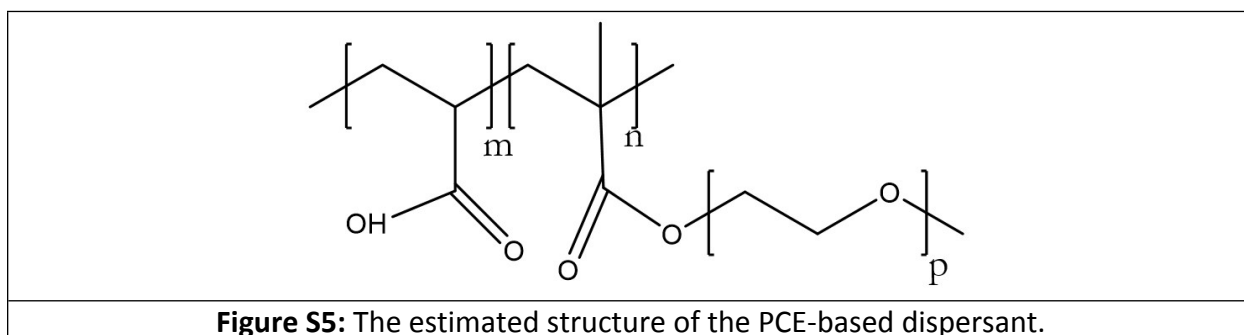

109

## 110 References

- 111 1J. N. Israelachvili, *Intermolecular and Surface Forces*, Academic Press, 2015.  
112 2W.-H. Shih, W. Y. Shih, S.-I. Kim, J. Liu and I. A. Aksay, *Phys. Rev. A*, 1990, **42**, 4772–4779.  
113 3L. M. Rueschhoff, J. P. Youngblood and R. W. Trice, *J. Am. Ceram. Soc.*, 2016, **99**, 3857–3865.

114

115
